# Supplementary material for: A facile strategy to fabricate a skin-like hydrogel with adhesive and highly stretchable attributes through small molecule triggering toward flexible electronics
Source: Royal Society of Chemistry journal article supplement (doi:10.1039/d3tb02186f), 2023-01-01
Supplement: d3tb02186f1.pdf [file d3tb02186f1.pdf]

## Supporting Information

### **A Facile Strategy to Fabricate a Skin-like Hydrogel with Adhesive and Highly Stretchable Attributes through Small Molecule Triggering toward Flexible Electronics**

Qi Chen<sup>a, ‡</sup>, Xiang Ke<sup>a, ‡</sup>, Yusong Cai<sup>a</sup>, Hao Wang<sup>a</sup>, Zhiyun Dong<sup>a</sup>, Xinlong Li<sup>a</sup>, Jinlin Li<sup>a</sup>,  
Xinyuan Xu<sup>a</sup>, Jun Luo<sup>a\*</sup>, and Jianshu Li<sup>a,b\*</sup>

<sup>a</sup>College of Polymer Science and Engineering, State Key Laboratory of Polymer  
Materials Engineering, Sichuan University, Chengdu 610065, P.R. China.

<sup>b</sup>State Key Laboratory of Oral Diseases, West China Hospital of Stomatology, Sichuan  
University, Chengdu 610041, China.

Correspondence: Jun Luo (luojuncd@scu.edu.cn) and Jianshu Li  
(jianshu\_li@scu.edu.cn)

<sup>‡</sup>These authors contributed equally to this work.

**Table S1.** Composition of hydrogels with different tris content.

|                | 30 wt% AM<br>(g) | MBA<br>(mg) | APS<br>(mg) | Tris<br>(wt%) | Tris<br>(g) |
|----------------|------------------|-------------|-------------|---------------|-------------|
| <b>P</b>       |                  |             |             | 0.00          | 0.00        |
| <b>PT-0.25</b> | 8.00             | 4.00        | 8.00        | 25.00         | 2.00        |
| <b>PT</b>      |                  |             |             | 50.00         | 4.00        |

**Table S2.** Composition of hydrogels with different tris contents and the pH value of the solution before polymerization.

|                | 30 wt% AM<br>(g) | MBA<br>(mg) | APS<br>(mg) | Tris<br>(wt%) | Tris<br>(g) | pH    |
|----------------|------------------|-------------|-------------|---------------|-------------|-------|
| <b>P</b>       |                  |             |             | 0.00          | 0.00        | 7.23  |
| <b>PT-0.25</b> | 8.00             | 4.00        | 8.00        | 25.00         | 2.00        | 11.11 |
| <b>PT</b>      |                  |             |             | 50.00         | 4.00        | 11.29 |

**Table S3.** Composition of hydrogels with different CaCl<sub>2</sub> content.

|                | 30 wt% AM<br>(g) | MBA<br>(mg) | APS<br>(mg) | Tris<br>(g) | CaCl <sub>2</sub><br>(wt%) | CaCl <sub>2</sub><br>(g) |
|----------------|------------------|-------------|-------------|-------------|----------------------------|--------------------------|
| <b>PT</b>      |                  |             |             |             | 0.00                       | 0.00                     |
| <b>PTC-10%</b> | 8.00             | 4.00        | 8.00        | 4.00        | 10.00                      | 0.80                     |
| <b>PTC</b>     |                  |             |             |             | 30.00                      | 2.40                     |

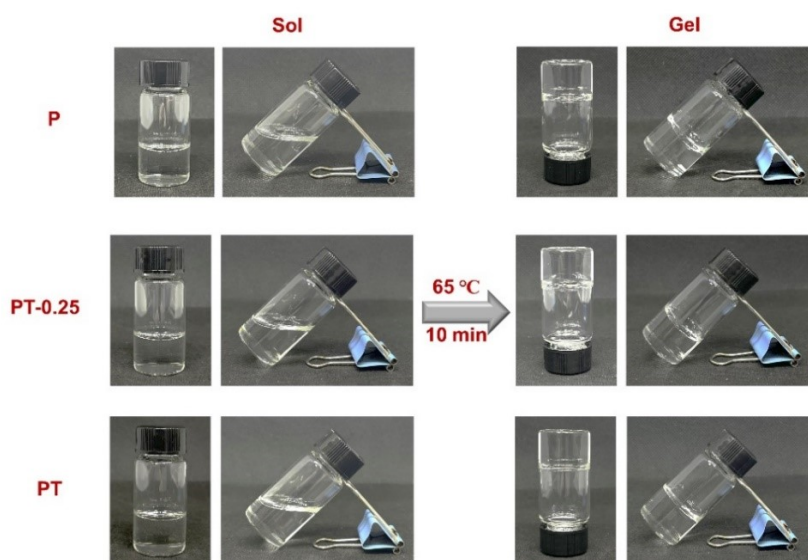**Figure S1.** The synthesis process of hydrogels with different tris content.

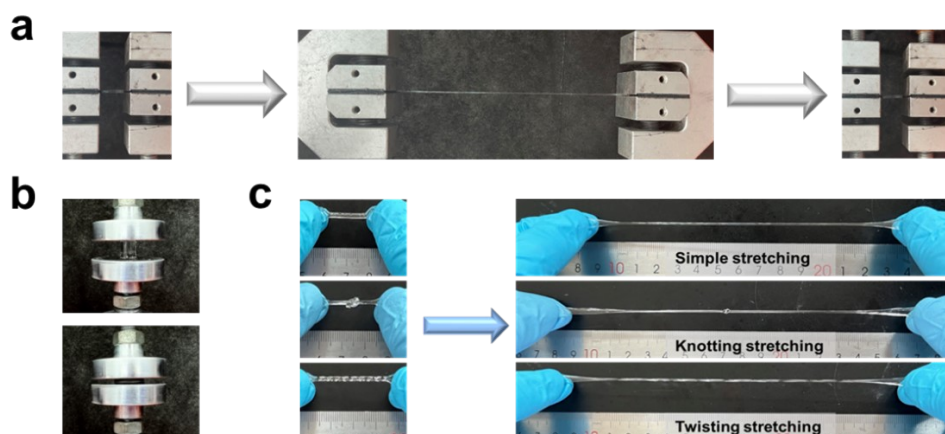

**Figure S2.** (a-b) Photographs of the PT hydrogel bearing large tension and compression strain; (c) the simple stretching, knotting stretching and twisting stretching.

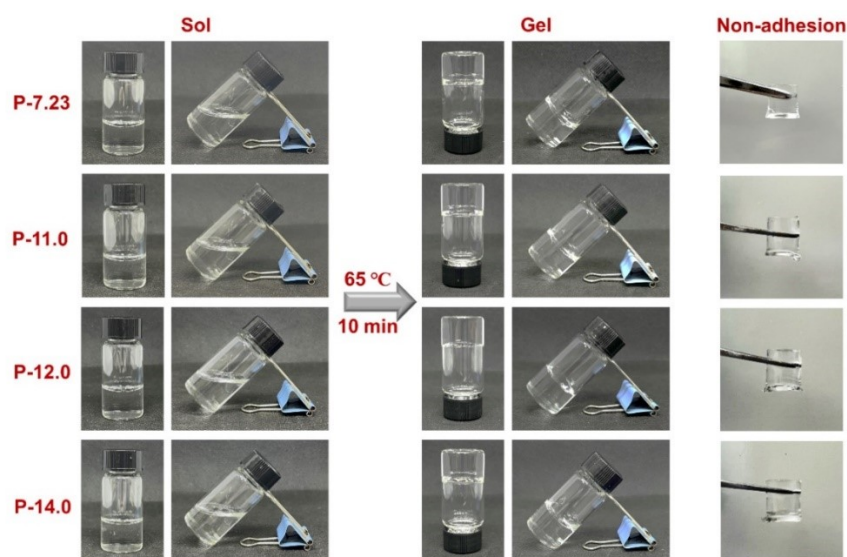

**Figure S3.** Synthesis process and adhesion of polyacrylamide hydrogels with different pH value adjusted by NaOH.

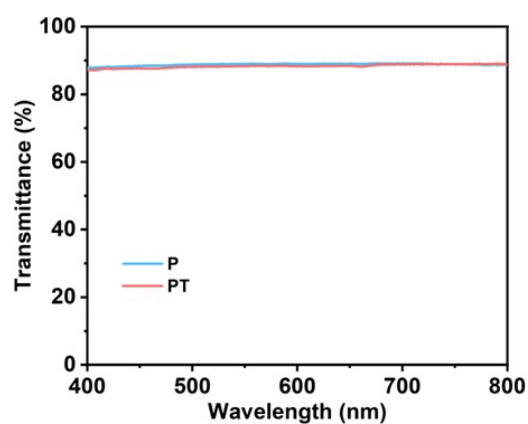

**Figure S4.** Transmittance of P and PT hydrogels within the visible light spectrum, spanning the range of 400 to 800 nm.

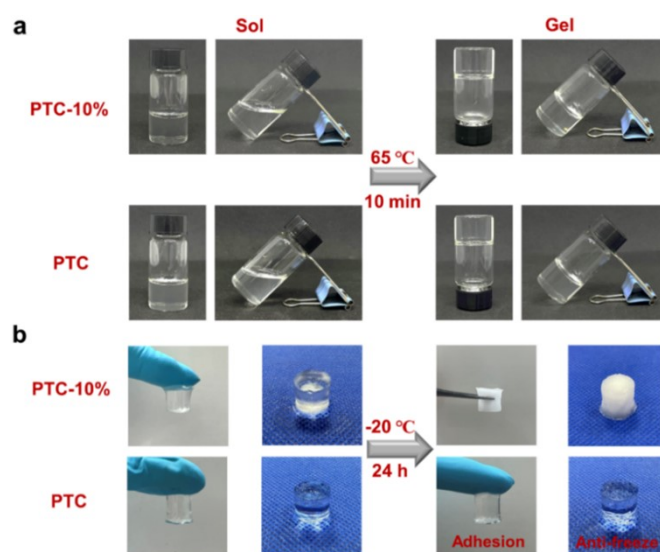

**Figure S5.** (a) The synthesis process and (b) anti-freezing ability of hydrogels with different  $\text{CaCl}_2$  content.

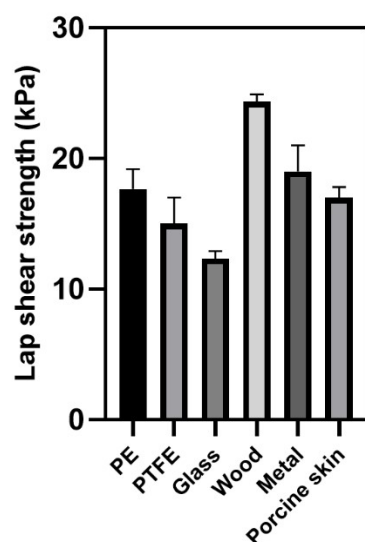

**Figure S6.** The lap shear strength of PTC hydrogels.

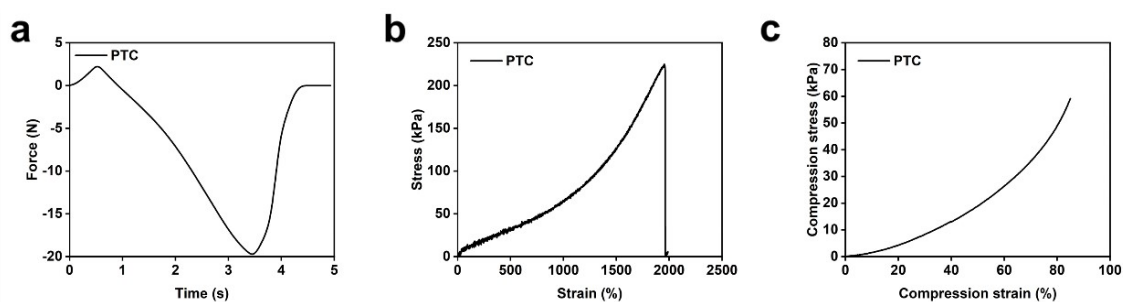

**Figure S7.** (a) The adhesion force of P, PT and PTC hydrogels; (b) typical uniaxial tensile stress-strain curves and (c) compression stress-strain curves of P, PT and PTC hydrogels.

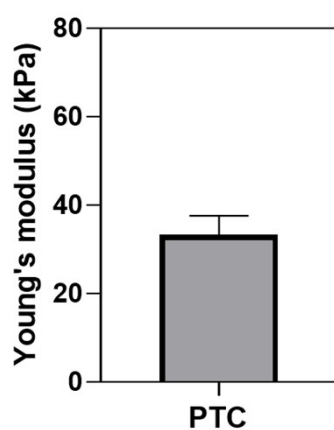

**Figure S8.** Young's modulus of different hydrogels.

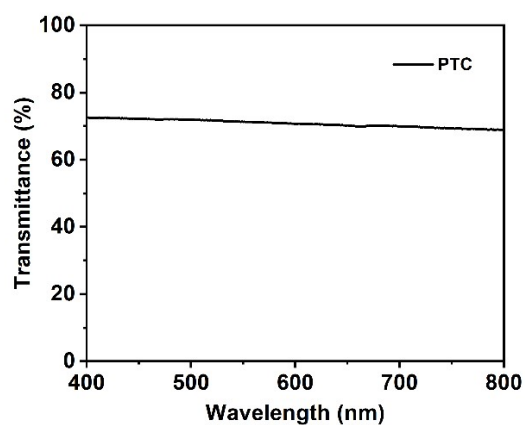

**Figure S9.** Transmittance of PTC hydrogels within the visible light spectrum, spanning the range of 400 to 800 nm.

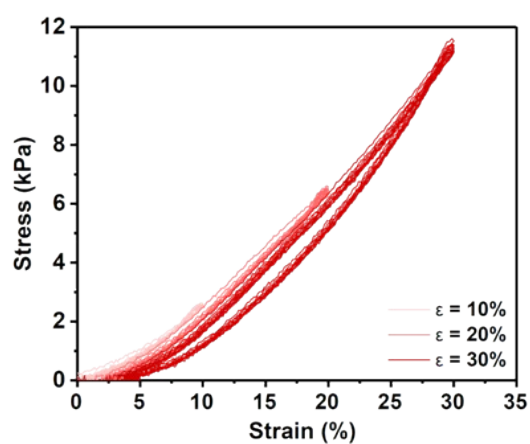

**Figure S10.** Cyclic compression stress of PTC hydrogel at different strains.

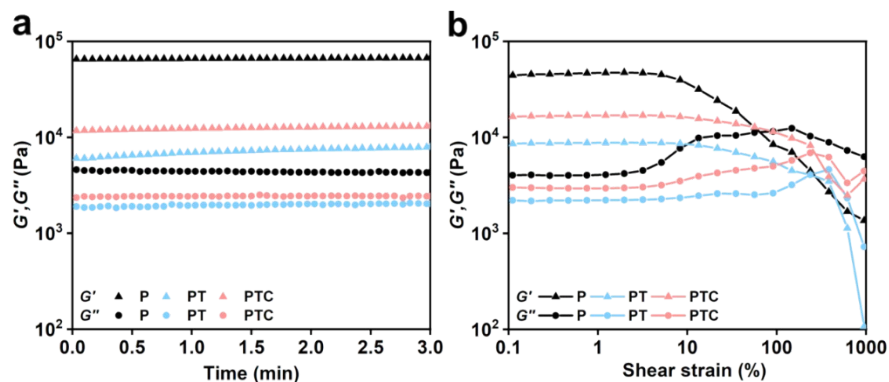

**Figure S11.** Rheological (a) time sweeps and (b) strain sweeps conducted on P, PT and PTC hydrogels.

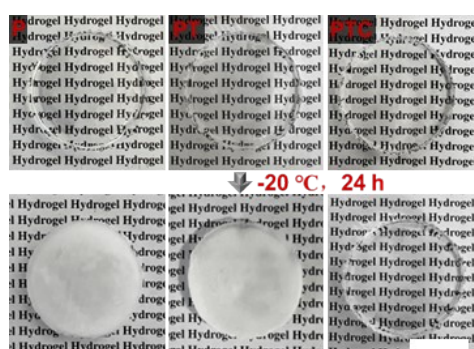

**Figure S12.** Photographs of P, PT and PTC hydrogels before and after being stored at  $-20\text{ }^{\circ}\text{C}$ .

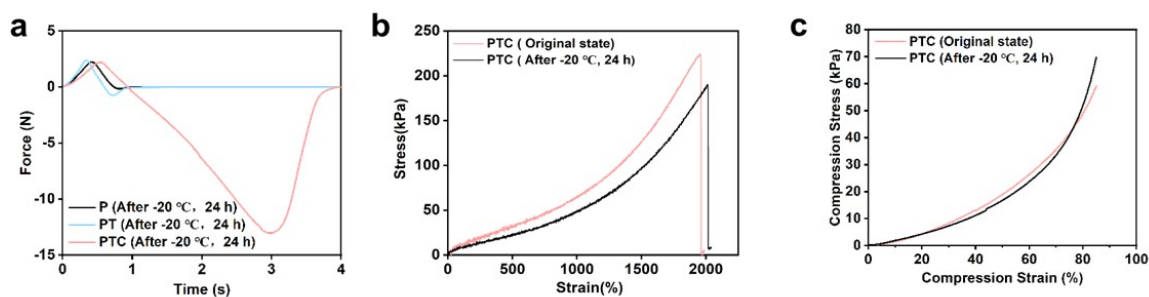

**Figure S13.** (a) The adhesion force of P, PT, and PTC hydrogels after being frozen for 24 h at  $-20\text{ }^{\circ}\text{C}$ ; (b-c) the tensile and compression properties of PTC hydrogels before and after freezing.

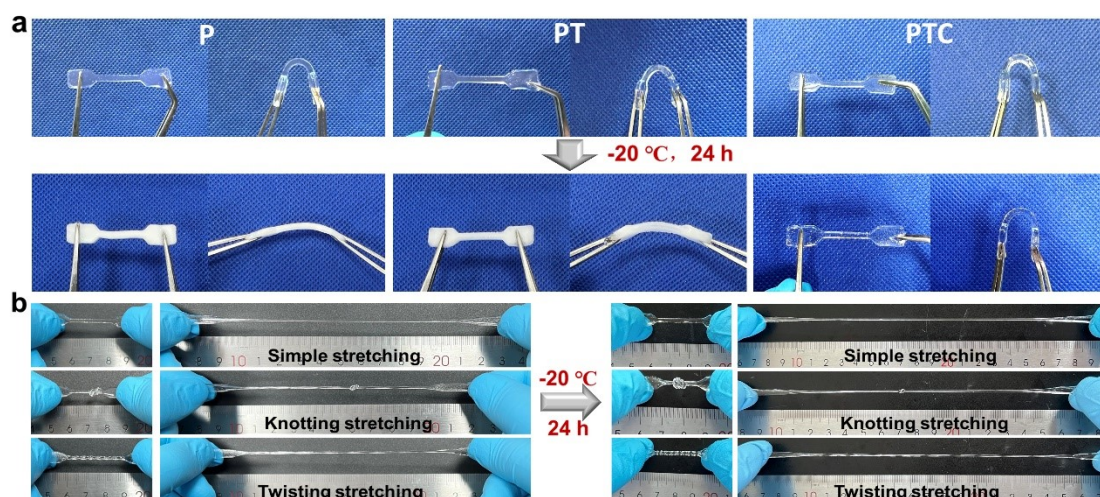

**Figure S14.** (a) Photographs of P, PT, and PTC hydrogels after being frozen for 24 hours at -20 °C; (b) the tensile properties of PTC hydrogel before and after freezing.

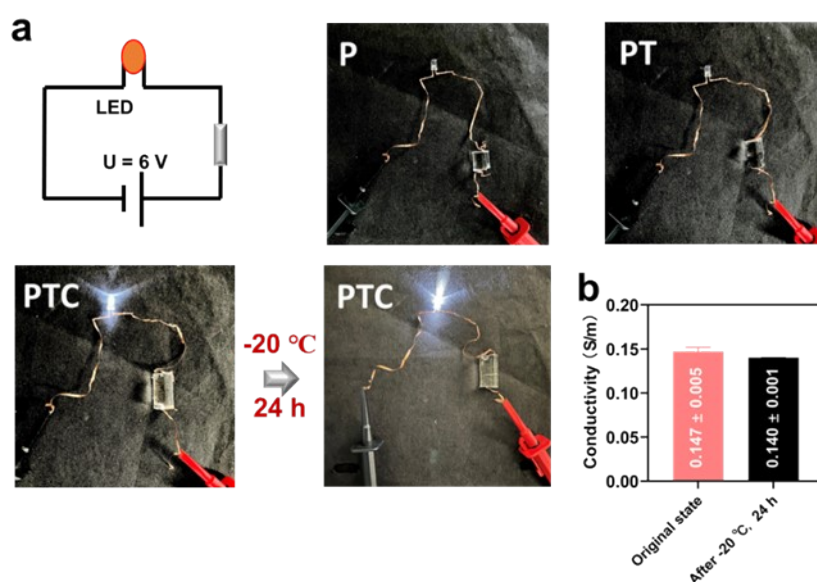

**Figure S15.** (a) Photographs of the conductive PTC hydrogel that makes LED bright; (b) changes in the electrical conductivity of the PTC hydrogel before and after freezing.

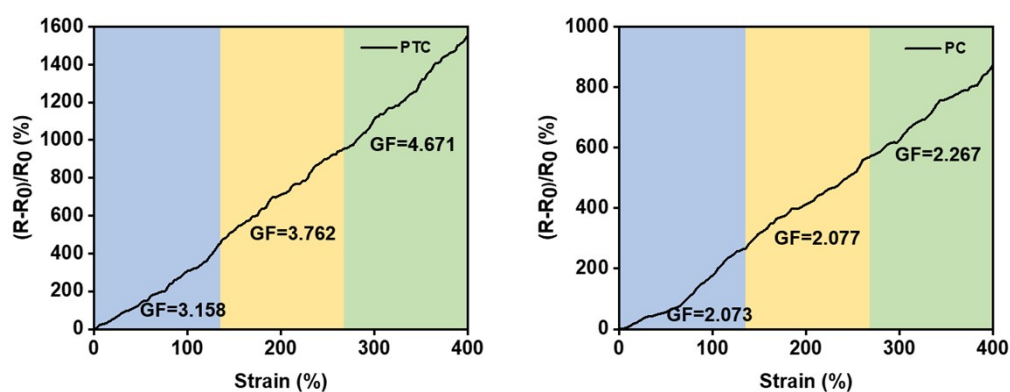

**Figure S16.** The Gauge factor of PTC and PC hydrogels.

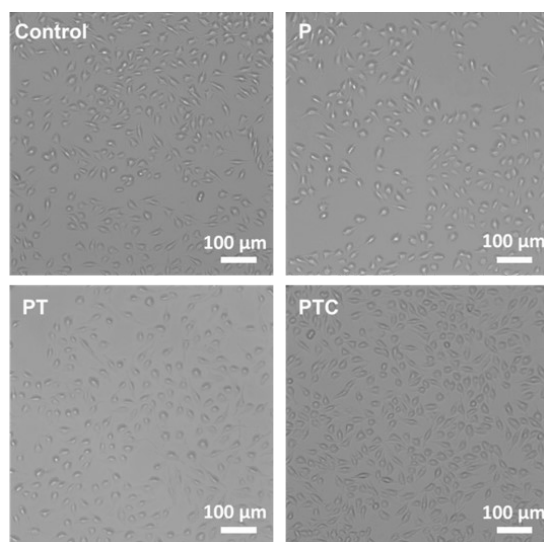

**Figure S17.** L929 cells morphology after incubation with different hydrogels.
